# Supplementary material for: A reinforced ceramic-coated separator by overall-covered modification of electron-insulated polypyrrole for the safe performance of lithium-ion batteries
Source: Royal Society of Chemistry journal article supplement (doi:10.1039/d0qm00849d), 2020-12-21
Supplement: d0qm00849d1.pdf [file d0qm00849d1.pdf]

## Supporting Information

### **A reinforced ceramic-coated separator by overall-covered modification of electron-insulated polypyrrole for safety performance of lithium-ion batteries**

Longqing Peng<sup>a</sup>, Xin Wang<sup>a</sup>, Jianhui Dai<sup>b</sup>, Xiu Shen<sup>a</sup>, Boyang Huang<sup>a</sup>, Peng Zhang<sup>b,\*</sup>,  
Jinbao Zhao<sup>a,b,\*</sup>

<sup>a</sup>College of Chemistry and Chemical Engineering, Xiamen University, Engineering Research Center of Electrochemical Technology, Ministry of Education, State-Province Joint Engineering Laboratory of Power Source Technology For New Energy Vehicle, Xiamen 361005, China

<sup>b</sup>College of Energy Research & School of Energy Research, Xiamen University, Xiamen

\*Corresponding author E-mail: [jbzhao@xmu.edu.cn](mailto:jbzhao@xmu.edu.cn) , [pengzhang@xmu.edu.cn](mailto:pengzhang@xmu.edu.cn)

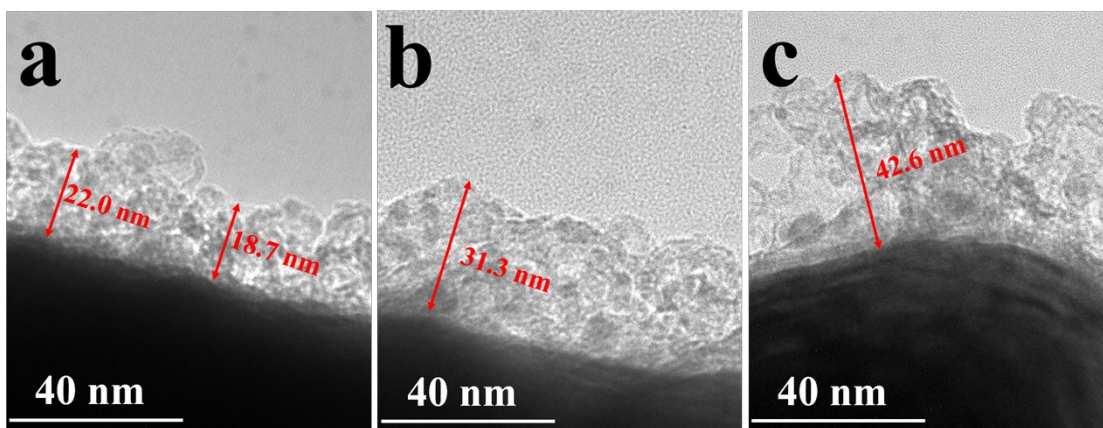

**Figure S1.** The TEM images of PPy modified  $\text{Al}_2\text{O}_3$  particles prepared by (a) 7.5, (b) 10, and 20  $\text{mmol}\cdot\text{L}^{-1}$  Py and APS hybrid solution.

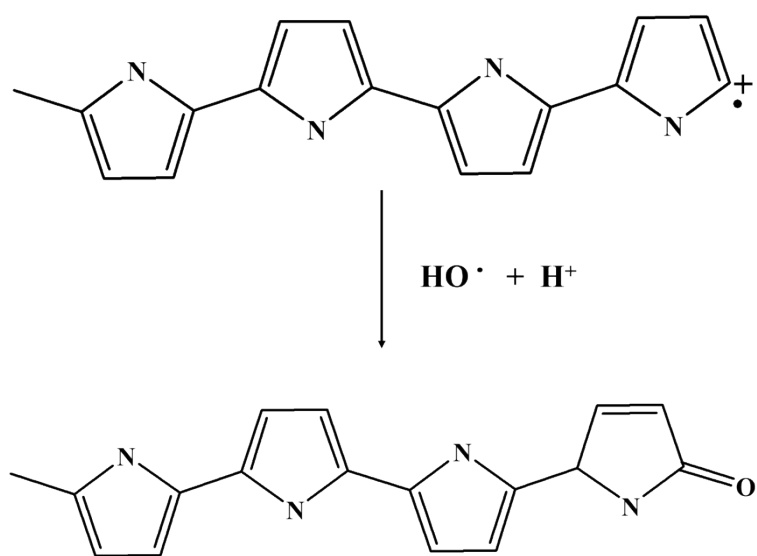

**Figure S2.** The degradation of PPy by OH radicals, with the subsequent formation of  $\text{C}=\text{O}$  moieties.

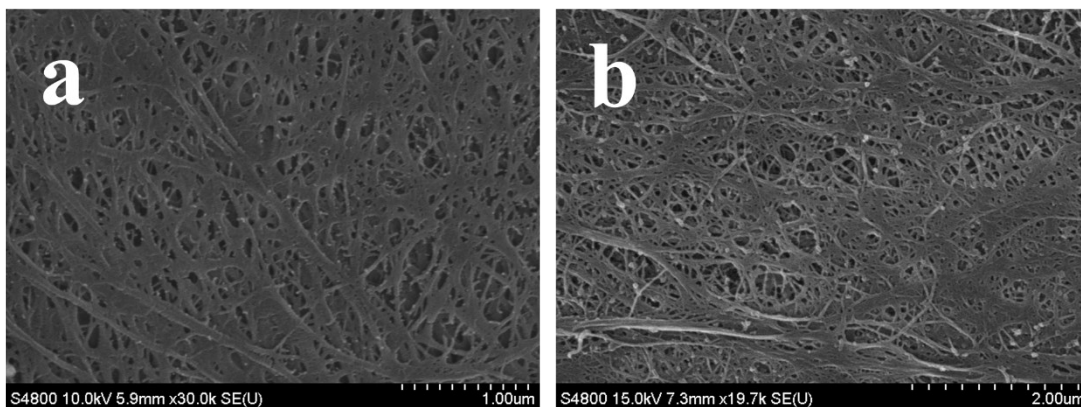

**Figure S3.** The SEM image of peeled CCS (a) and CCS@PPy-10 (b).

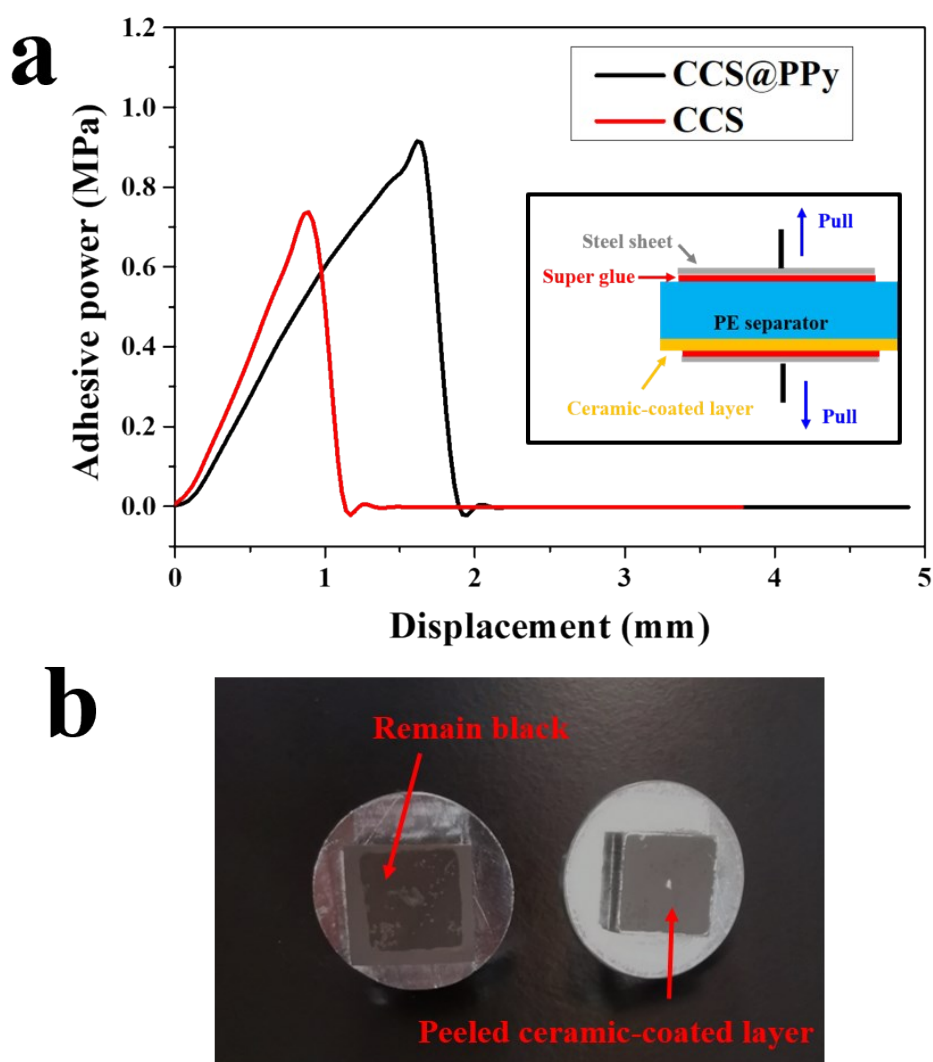

**Figure S4.** The result of adhesion test of CCS and CCS@PPy-10 (a) and image of CCS@PPy-10 after adhesion test (b).

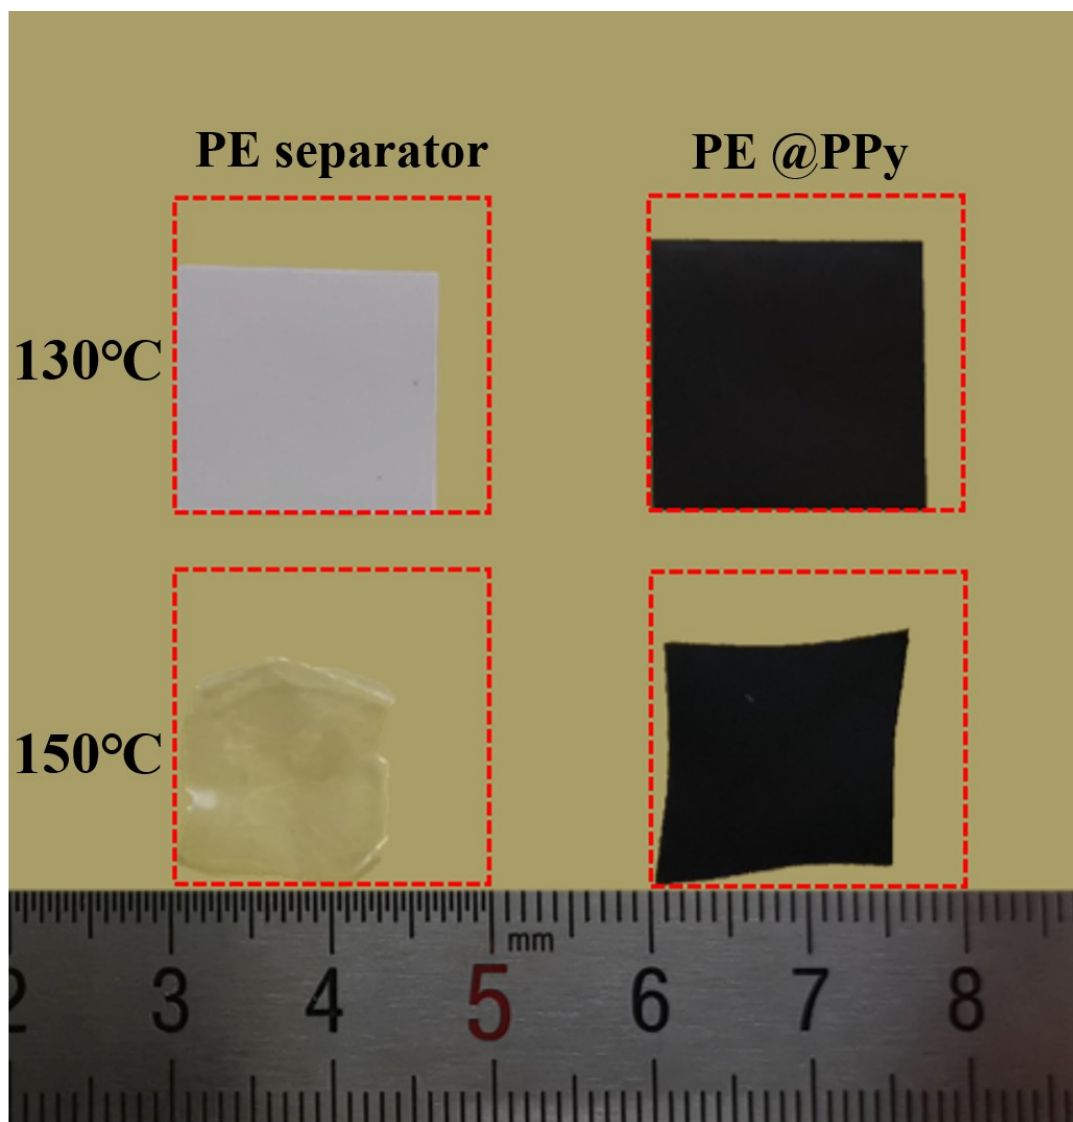

**Figure S5.** The thermal shrinkage tests of PE separator and PE@PPy at various temperature.

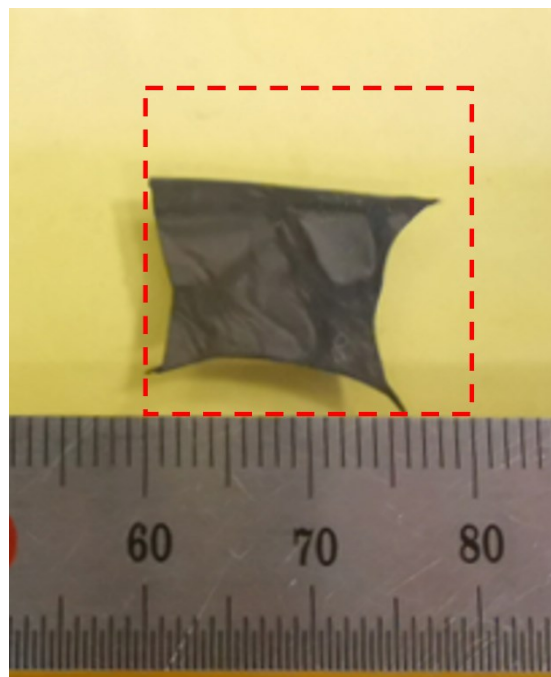

**Figure S6.** The photo of CCS@PPy-7.5 after heating at 200 °C for 30 min.

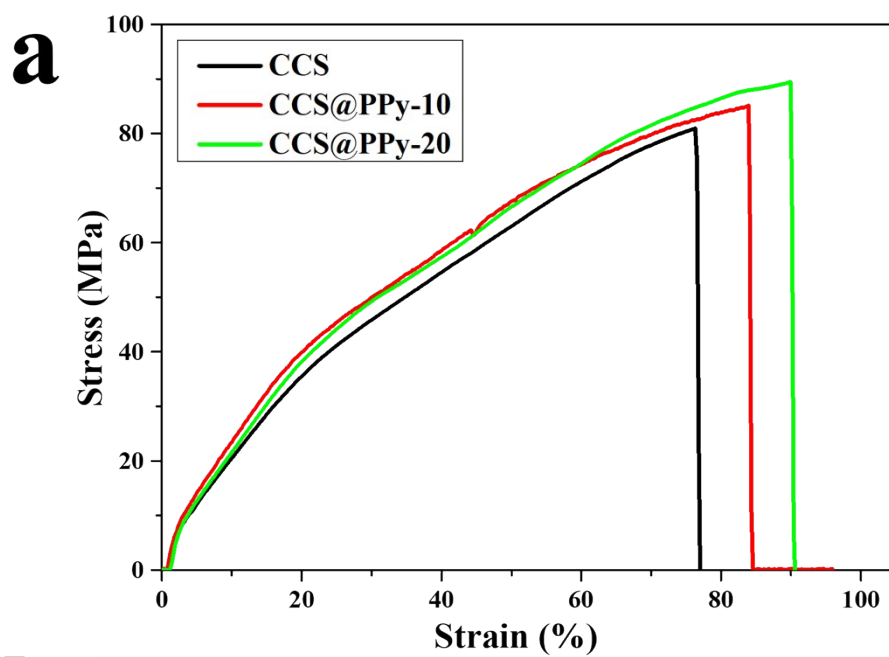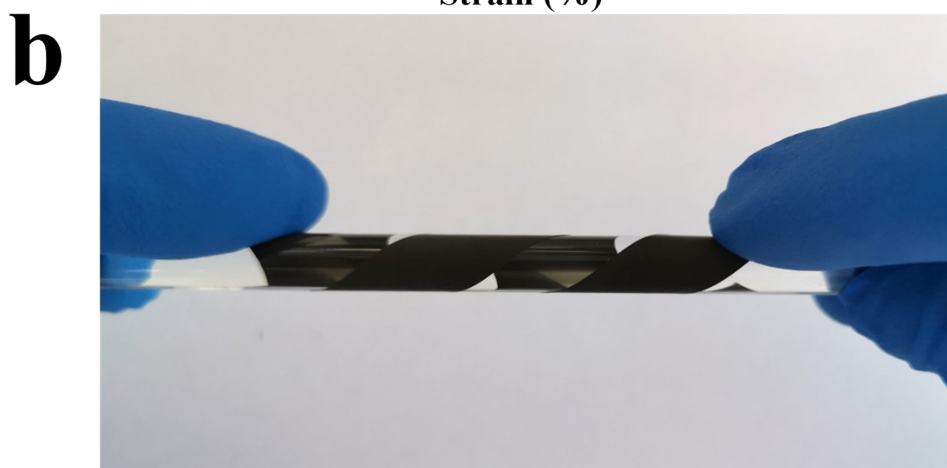

**Figure S7.** (a) The stress–strain curves of CCS, CCS@PPy-10, and CCS@PPy-20, (b) the photo of CCS@PPy wrapping a glass rod.

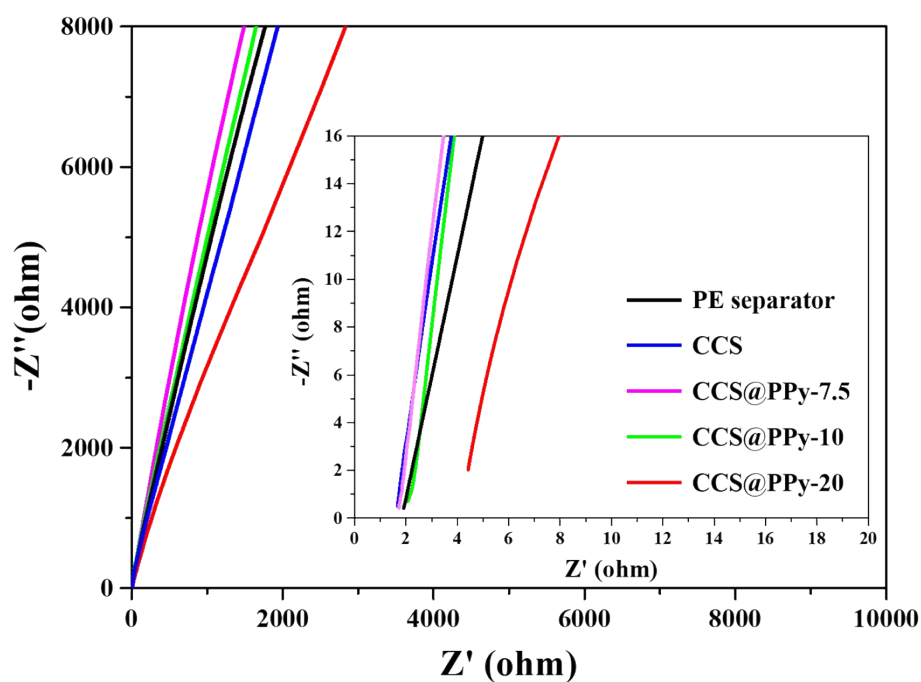

**Figure S8.** The electrochemical impedance spectroscopy of PE separator, CCS, CCS@PPy-7.5, CCS@PPy-10, and CCS@PPy-20.

**Table S1** The result of electrical resistivity of PPy

| Serial number | Thickness<br>( $\mu\text{m}$ ) | Diameter<br>(mm) | Resistance<br>(M $\Omega$ ) | Electrical resistivity<br>( $\Omega\cdot\text{cm}$ ) |
|---------------|--------------------------------|------------------|-----------------------------|------------------------------------------------------|
| 1             | 85                             | 12               | 61.5                        | 8.14E+9                                              |
| 2             | 96                             | 12               | 70.2                        | 8.25E+9                                              |
| 3             | 120                            | 12               | 87.1                        | 8.22E+9                                              |
| Average       |                                |                  |                             | 8.20E+9                                              |
